# Supplementary material for: Impact of asthma on working life: an analysis of the French CONSTANCES cohort
Source: HighWire-hosted journal article supplement (doi:10.1136/oemed-2022-108671), 2023-05-25
Supplement: oemed-2022-108671supp001_data_supplement.pdf [file oemed-2022-108671supp001_data_supplement.pdf]

**Online supplement****Table S1.** Career path and current asthma\*, separately in men and women (multivariate analysis)

|                                                             | Men              | Women            |                |
|-------------------------------------------------------------|------------------|------------------|----------------|
|                                                             | OR (95% CI)      | OR (95% CI)      | <i>P</i> inter |
| Number of job periods                                       |                  |                  | 0.8            |
| 1-2                                                         | 1                | 1                |                |
| 3-4                                                         | 1.28 (1.04-1.59) | 1.18 (0.98-1.41) |                |
| ≥5                                                          | 1.41 (1.11-1.78) | 1.31 (1.06-1.62) |                |
| Total duration of employment                                |                  |                  | 0.04           |
| 1-9 years                                                   | 1                | 1                |                |
| 10-19 years                                                 | 1.02 (0.76-1.36) | 0.88 (0.70-1.11) |                |
| 20-29 years                                                 | 1.01 (0.69-1.49) | 0.61 (0.45-0.83) |                |
| ≥30 years                                                   | 0.72 (0.43-1.20) | 0.66 (0.46-0.96) |                |
| Number of part-time jobs                                    |                  |                  | 0.4            |
| 0                                                           | 1                | 1                |                |
| ≥1                                                          | 1.21 (0.98-1.50) | 1.04 (0.91-1.19) |                |
| Number of unemployment-related periods of work interruption |                  |                  | 0.5            |
| 0                                                           | 1                | 1                |                |
| ≥1                                                          | 1.12 (0.87-1.43) | 1.00 (0.82-1.23) |                |
| Number of health-related periods of work interruption       |                  |                  | 0.4            |
| 0                                                           | 1                | 1                |                |
| ≥1                                                          | 1.65 (0.99-2.23) | 1.57 (1.20-2.06) |                |
| Employment status at inclusion                              |                  |                  | 0.02           |
| Employed                                                    | 1                | 1                |                |
| Unemployed                                                  | 1.20 (0.88-1.63) | 1.30 (0.98-1.72) |                |
| Retired                                                     | 0.69 (0.50-0.94) | 1.15 (0.86-1.54) |                |
| Not working for health issues                               | 1.62 (0.73-3.58) | 2.32 (1.37-3.94) |                |
| Other (in training, no activity)                            | 0.75 (0.47-1.37) | 1.08 (0.73-1.60) |                |

\*Current asthma: asthma symptoms (wheezing, woken up with chest tightness, attack of shortness of breath at rest or after exercise, woken by attack of shortness of breath, or asthma attack) in the last 12 months, or current treatment for asthma, in a participant with lifetime asthma, regardless of confirmation of the diagnosis by a physician.

OR: odds ratio; CI: confidence interval; *P* inter: *P* interaction between gender and career path indicator. Logistic regressions adjusted for age, smoking status, educational level and body mass index.
