# Supplementary material for: Impact of asthma on working life: an analysis of the French CONSTANCES cohort
Source: HighWire-hosted journal article supplement (doi:10.1136/oemed-2022-108671), 2023-05-25
Supplement: oemed-2022-108671supp002_data_supplement.pdf [file oemed-2022-108671supp002_data_supplement.pdf]

**Online supplement****Table S2.** Career path and asthma symptom score (multivariate analysis stratified by age, all genders)

|                                                             | Mean score ratio (95% CI) |                  |
|-------------------------------------------------------------|---------------------------|------------------|
|                                                             | <40 years                 | ≥40 years        |
| Number of period of jobs                                    |                           |                  |
| 1-2                                                         | 1                         | 1                |
| 3-4                                                         | 1.12 (1.01-1.25)          | 1.13 (1.03-1.24) |
| ≥5                                                          | 1.19 (1.04-1.36)          | 1.28 (1.17-1.40) |
| Total duration of employment                                |                           |                  |
| 1-9 years                                                   | 1                         | 1                |
| 10-19 years                                                 | 0.91 (0.82-1.01)          | 0.81 (0.68-0.97) |
| ≥20 years                                                   | 0.73 (0.53-1.01)          | 0.66 (0.64-0.78) |
| Number of part-time jobs                                    |                           |                  |
| 0                                                           | 1                         | 1                |
| ≥1                                                          | 1.20 (1.07-1.35)          | 1.15 (1.05-1.26) |
| Number of unemployment-related periods of work interruption |                           |                  |
| 0                                                           | 1                         | 1                |
| ≥1                                                          | 1.17 (1.03-1.34)          | 1.16 (1.06-1.27) |
| Number of health-related periods of work interruption       |                           |                  |
| 0                                                           | 1                         | 1                |
| ≥1                                                          | 1.51 (1.21-1.98)          | 1.61 (1.42-1.81) |
| Employment status at inclusion                              |                           |                  |
| Employed                                                    | 1                         | 1                |
| Unemployed                                                  | 1.32 (1.14-1.52)          | 1.44 (1.25-1.67) |
| Retired                                                     | -                         | 0.97 (0.84-1.10) |
| Not working for health issues                               | 1.92 (1.06-3.49)          | 2.12 (1.74-2.57) |
| Other (in training, no activity)                            | 1.27 (1.06-1.52)          | 1.68 (1.36-2.07) |

Mean score ratio adjusted for smoking status, educational level and body mass index; CI: confidence interval
