# Supplementary material for: Impact of asthma on working life: an analysis of the French CONSTANCES cohort
Source: PubMed Central journal article supplement — Occup Environ Med. 2023 May 25;80(7):392–8. doi: 10.1136/oemed-2022-108671 (PMC10314005; doi:10.1136/oemed-2022-108671), 2023-05-25
Supplement: oemed-2022-108671supp003.pdf [file oemed-2022-108671supp003.pdf]

**Online supplement****Table S3.** Career path and asthma symptom score (multivariate analysis stratified by smoking status, all genders)

|                                                             | Mean score ratio (95% CI) |                      |
|-------------------------------------------------------------|---------------------------|----------------------|
|                                                             | Never smokers             | Current / Ex-smokers |
| Number of jobs                                              |                           |                      |
| 1-2                                                         | 1                         | 1                    |
| 3-4                                                         | 1.02 (0.91-1.16)          | 1.13 (1.04-1.24)     |
| ≥5                                                          | 1.27 (1.12-1.44)          | 1.21 (1.11-1.33)     |
| Total duration of employment                                |                           |                      |
| 1-9 years                                                   | 1                         | 1                    |
| 10-19 years                                                 | 0.75 (0.64-0.87)          | 0.95 (0.85-1.07)     |
| 20-29 years                                                 | 0.71 (0.59-0.86)          | 0.79 (0.68-0.92)     |
| ≥30 years                                                   | 0.60 (0.47-0.75)          | 0.66 (0.56-0.79)     |
| Number of part-time jobs                                    |                           |                      |
| 0                                                           | 1                         | 1                    |
| ≥1                                                          | 1.32 (1.17-1.49)          | 1.08 (0.99-1.18)     |
| Number of unemployment-related periods of work interruption |                           |                      |
| 0                                                           | 1                         | 1                    |
| ≥1                                                          | 1.16 (1.01-1.33)          | 1.13 (1.03-1.23)     |
| Number of health-related periods of work interruption       |                           |                      |
| 0                                                           | 1                         | 1                    |
| ≥1                                                          | 1.71 (1.40-2.08)          | 1.51 (1.33-1.72)     |
| Employment status                                           |                           |                      |
| Employed                                                    | 1                         | 1                    |
| Unemployed                                                  | 1.32 (1.09-1.60)          | 1.39 (1.24-1.57)     |
| Retired                                                     | 1.04 (0.89-1.22)          | 0.98 (0.87-1.10)     |
| Not working for health issues                               | 3.36 (1.63-3.41)          | 2.08 (1.69-2.55)     |
| Other                                                       | 1.59 (1.24-2.02)          | 1.28 (1.08-1.51)     |

Mean score ratio adjusted for age, educational level and body mass index; CI: confidence interval
